# Supplementary material
Source: PubMed Central journal article supplement (PMC4135795)
Supplement: EC.00043-14_zek999094313so1.pdf [file EC.00043-14_zek999094313so1.pdf]

**TABLE S1. PCR primers used in this study**

| Primer                     | Sequence (5' → 3')                                   |
|----------------------------|------------------------------------------------------|
| 3'-Int1s                   | CATTGGACCTCGCAACCCTAG                                |
| 3'-Int3s                   | CACGAACTTCCGGGACGCCTC                                |
| 3'-Int4as                  | CCTCCGCCCTTTCTTCTTCGC                                |
| 5'-Int1s                   | ATGTCGCACTATTAGAAGGG                                 |
| 5'-Int3s                   | ATAATCTTGATGGCAGTTTCG                                |
| 5'-Int2as                  | CCGGTCCCGGATTAATAATC                                 |
| Fusion-primer1s            | CAACAGCAGTCAACAGATCA                                 |
| Fusion-primer2as           | GCATGCCAGAAAGAGTCACCATCGTCTTCTGCAATCGGTA             |
| Fusion-primer3s            | TTCATTTTCGGGAGACGAGATAACGCGAGAGGTAGAAAAG             |
| Fusion-primer4as           | CGCTGACAACTTCCGTGGTA                                 |
| Fusion-primer5s            | TACCGATTGCAGAAGACGATGGTGACTCTTTCTGGCATGC             |
| Fusion-primer6as-2         | CCTCTAAGTTCTTCATCATCTCTCGTCTCCCGAAAATGAA             |
| Fusion-primer7s            | TTCATTTTCGGGAGACGAGAGATGAAGAACTTAGAGG                |
| Fusion-primer8as           | GATTTCAAATGTTGCAGA                                   |
| GFP-Fus-HPH1-2s            | GACCCGGGTACAGTGACCGGTGACTCTTTC                       |
| GFP-Fus-HPH2as             | GCTCTAGATCTCTTCGCCGGAGCCTG                           |
| GPD-cDNA-test-s            | GAACGATCCATTCATTGA                                   |
| GPD-cDNA-test-as           | GCTTGCCGTTGAGCTCTGGG                                 |
| GPD-RTs                    | TCAAGGGCACGATCGAGGCT                                 |
| GPD-RTas                   | TCGCTCCATGGGATCTCGGA                                 |
| HO05J24F                   | GTGCGCTGTGGTCAAGATGTT                                |
| HO05J24R                   | TAGTGATATCGCTCATGCCGG                                |
| HPH1s                      | AAAGTTCGACAGCGTCTCCG                                 |
| HPH200-f                   | GAGCGGGTTCGGCCCATTCG                                 |
| HPH CDS2s                  | CAC TCG TCC GAG GGC AAA GG                           |
| LB20 <sub>57</sub> WT16bis | GAGTAAGTCTGCAACAGCAG                                 |
| LB20 <sub>57</sub> WT17    | GTCAACAGATGAATTCGAGC                                 |
| Oligo-dT-spec              | TGTAATACGACTCACTATAGGGCGAGAATTCAACG(T) <sub>18</sub> |
| Oligo-dT-out               | TGTAATACGACTCACTATAGGGCG                             |
| Oligo-dT-in                | TCACTATAGGGCGAGAATTCAACG                             |
| PFP-ESTs                   | ATAAAGCGGAACTACTATAA                                 |
| PFP-RTs                    | GATCCCCAGGTGAAGCCCGA                                 |

|             |                                   |
|-------------|-----------------------------------|
| PFP-RTas    | GATTCGCTTCCCCAGACGCC              |
| PFP2as      | ATACCGCGTCCAATTAAGT               |
| PFP3s       | TGATATGGACGAGCAGGATG              |
| PFP13s      | GTTCTAGAGAAGTATAGTTTCGACATCGTGGAG |
| PFP19s      | CTAGCGGTTCTTGACGGTAC              |
| PFP21as     | CCTTGTCTTCGAATCGAGCCAG            |
| PFP23as     | AGCAGGCTCGCTTCTTTTAC              |
| PFP27s      | ACTGCTGGCCAAGATTCAATTG            |
| PFP48s      | TCGGGCCCCGTATCTTGGCTTCCCAA        |
| PFP49as     | GAGGGCCCAAAGATTTCAAATGTTGC        |
| pSS2-ble3s  | GCCAAGTTGACCAGTGCCGT              |
| pSS2-ble4as | CAGTCCTGCTCCTCGGCCAC              |

**TABLE S2.****(A) Total amino acid sequence comparison**

|                |                      | Identity [%] |      |                    |                    |       |        |        |        |      |
|----------------|----------------------|--------------|------|--------------------|--------------------|-------|--------|--------|--------|------|
|                |                      | PFP1         | NTO1 | BRPF1 <sup>a</sup> | BRPF2 <sup>b</sup> | BRPF3 | JADE-1 | JADE-2 | JADE-3 | EPL1 |
| Similarity [%] | PFP1 <sup>IV c</sup> | -            | 18.6 | 22.3               | 19.3               | 22.1  | 19.0   | 18.4   | 18.1   | 13.6 |
|                | NTO1 <sup>IV</sup>   | 29.4         | -    | 15.1               | 17.2               | 20.0  | 17.3   | 18.9   | 18.0   | 13.4 |
|                | BRPF1 <sup>III</sup> | 33.4         | 24.0 | -                  | 49.7               | 45.7  | 19.6   | 19.0   | 19.0   | 12.4 |
|                | BRPF2 <sup>III</sup> | 28.3         | 28.1 | 62.1               | -                  | 50.4  | 21.6   | 19.8   | 19.5   | 14.1 |
|                | BRPF3 <sup>III</sup> | 34.2         | 32.9 | 56.7               | 62.3               | -     | 21.9   | 22.1   | 22.9   | 16.2 |
|                | JADE-1 <sup>IV</sup> | 30.0         | 30.4 | 29.0               | 33.0               | 33.9  | -      | 46.9   | 42.5   | 12.7 |
|                | JADE-2 <sup>IV</sup> | 28.8         | 29.2 | 28.6               | 29.8               | 33.0  | 58.9   | -      | 38.8   | 12.5 |
|                | JADE-3 <sup>IV</sup> | 28.8         | 30.2 | 28.5               | 29.3               | 34.5  | 56.1   | 52.5   | -      | 14.0 |
|                | EPL1 <sup>II</sup>   | 24.3         | 25.8 | 23.9               | 25.2               | 27.7  | 22.4   | 23.5   | 25.7   | -    |

<sup>a</sup> Alternative names: BR140, peregrin. <sup>b</sup> alternative names: BRD1, BRL. <sup>c</sup> Roman numbers indicate Epc-N classes. Proteins belonging to mainly histone 3-acetylating HAT complexes are marked in grey. GenBank accession numbers: NTO1, NP\_015356; BRPF1, NP\_001003694; BRPF2, XP\_005261529; BRPF2, AAI17388; JADE-1, NP\_955352; JADE-2, XP\_005272000; JADE-3, NP\_055550; EPL1, EEU04231. Sequences were aligned pairwise using the matrix BLOSUM62 of the European Molecular Biology Open Source Software Suite ([www.ebi.ac.uk/tools/psa/emboss\\_needle/](http://www.ebi.ac.uk/tools/psa/emboss_needle/)).

**(B) Comparison of Epc-N domains**

|                |                      | Identity [%] |      |                    |                    |       |        |        |        |
|----------------|----------------------|--------------|------|--------------------|--------------------|-------|--------|--------|--------|
|                |                      | PFP1         | NTO1 | BRPF1 <sup>a</sup> | BRPF2 <sup>b</sup> | BRPF3 | JADE-1 | JADE-2 | JADE-3 |
| Similarity [%] | PFP1 <sup>IV c</sup> | -            | 29.0 | 37.1               | 29.6               | 28.8  | 24.3   | 27.7   | 27.3   |
|                | NTO1 <sup>IV</sup>   | 42.4         | -    | 29.6               | 29.8               | 28.1  | 28.3   | 25.9   | 28.5   |
|                | BRPF1 <sup>III</sup> | 51.8         | 44.5 | -                  | 58.9               | 55.4  | 29.9   | 28.3   | 29.5   |
|                | BRPF2 <sup>III</sup> | 39.2         | 46.1 | 67.7               | -                  | 59.4  | 30.1   | 28.5   | 30.8   |
|                | BRPF3 <sup>III</sup> | 41.9         | 43.7 | 66.1               | 73.5               | -     | 28.5   | 28.0   | 29.9   |
|                | JADE-1 <sup>IV</sup> | 36.4         | 45.3 | 40.5               | 44.3               | 42.0  | -      | 62.0   | 61.7   |
|                | JADE-2 <sup>IV</sup> | 41.6         | 39.0 | 39.4               | 40.2               | 40.5  | 72.0   | -      | 56.1   |
|                | JADE-3 <sup>IV</sup> | 39.0         | 45.4 | 43.0               | 44.8               | 40.0  | 76.3   | 69.6   | -      |

<sup>a</sup> Alternative names: BR140, peregrin. <sup>b</sup> alternative names: BRD1, BRL. <sup>c</sup> Roman numbers indicate Epc-N classes. Proteins belonging to mainly histone 3-acetylating HAT complexes are marked in grey. GenBank accession numbers: NTO1, NP\_015356; BRPF1, NP\_001003694; BRPF2, XP\_005261529; BRPF3, AAI17388; JADE-1, NP\_955352; JADE-2, XP\_005272000; JADE-3, NP\_055550. Sequences were aligned pairwise using the matrix BLOSUM62 of the European Molecular Biology Open Source Software Suite ([www.ebi.ac.uk/tools/psa/emboss\\_needle/](http://www.ebi.ac.uk/tools/psa/emboss_needle/)).

### (C) Comparison of PHD-like domains

|                |                      | Identity [%] |      |                    |                    |       |        |        |        |
|----------------|----------------------|--------------|------|--------------------|--------------------|-------|--------|--------|--------|
|                |                      | PFP1         | NTO1 | BRPF1 <sup>a</sup> | BRPF2 <sup>b</sup> | BRPF3 | JADE-1 | JADE-2 | JADE-3 |
| Similarity [%] | PFP1 <sup>IV c</sup> | -            | 43.1 | 52.5               | 51.2               | 50.8  | 42.9   | 41.2   | 46.3   |
|                | NTO1 <sup>IV</sup>   | 62.6         | -    | 47.5               | 48.4               | 47.5  | 45.9   | 43.4   | 42.6   |
|                | BRPF1 <sup>III</sup> | 68.0         | 68.9 | -                  | 81.7               | 81.7  | 46.3   | 44.6   | 49.6   |
|                | BRPF2 <sup>III</sup> | 64.8         | 70.5 | 90.0               | -                  | 75.0  | 47.9   | 43.8   | 49.6   |
|                | BRPF3 <sup>III</sup> | 68.0         | 68.0 | 90.8               | 88.3               | -     | 45.6   | 42.4   | 47.2   |
|                | JADE-1 <sup>IV</sup> | 58.8         | 58.2 | 55.4               | 55.4               | 55.2  | -      | 82.3   | 78.8   |
|                | JADE-2 <sup>IV</sup> | 57.1         | 56.6 | 55.4               | 55.4               | 53.6  | 90.3   | -      | 76.1   |
|                | JADE-3 <sup>IV</sup> | 57.9         | 56.6 | 61.2               | 58.7               | 56.0  | 87.6   | 87.6   | -      |

<sup>a</sup> Alternative names: BR140, peregrin. <sup>b</sup> alternative names: BRD1, BRL. <sup>c</sup> Roman numbers indicate Epc-N classes. Proteins belonging to mainly histone 3-acetylating HAT complexes are marked in grey. GenBank accession numbers: NTO1, NP\_015356; BRPF1, NP\_001003694; BRPF2, XP\_005261529; BRPF2, AAI17388; JADE-1, NP\_955352; JADE-2, XP\_005272000; JADE-3, NP\_055550. Sequences were aligned pairwise using the matrix BLOSUM62 of the European Molecular Biology Open Source Software Suite ([www.ebi.ac.uk/tools/psa/emboss\\_needle/](http://www.ebi.ac.uk/tools/psa/emboss_needle/)).

Fig. S1

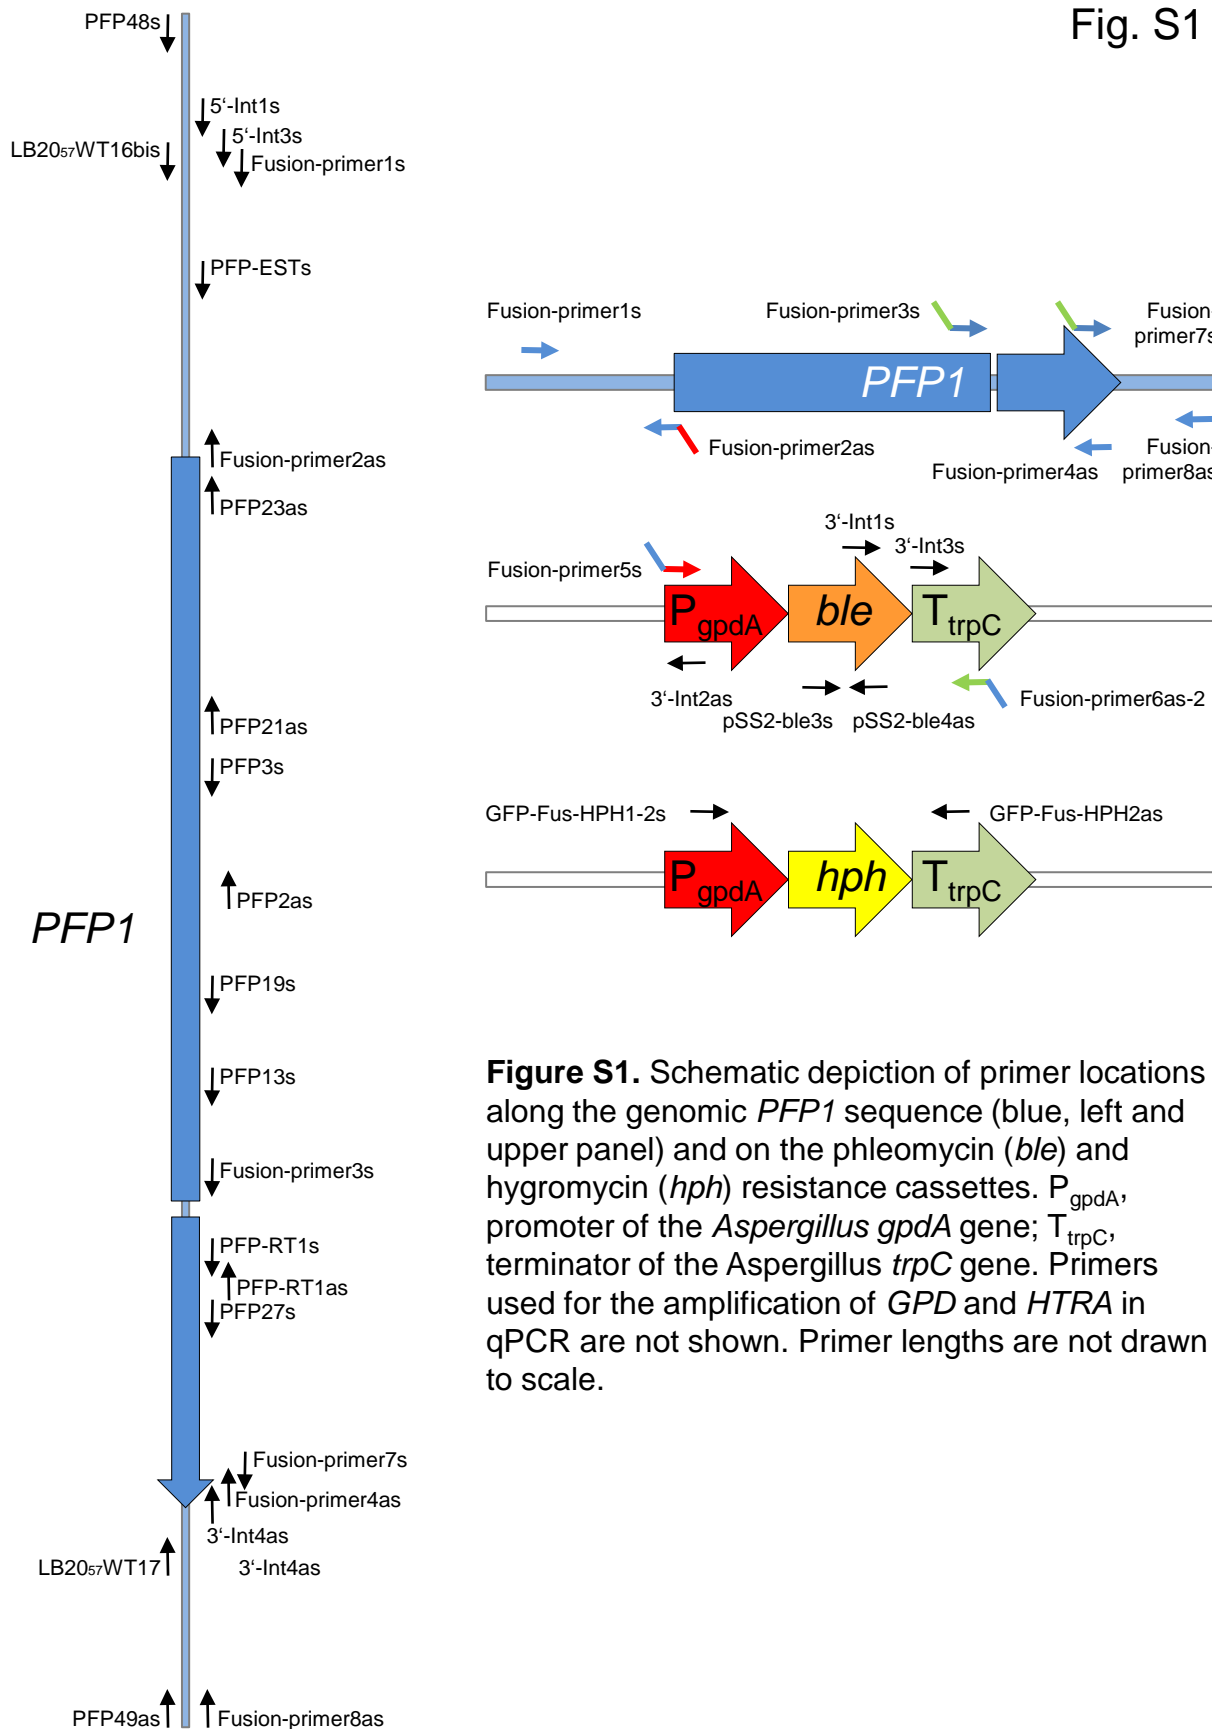

**Figure S1.** Schematic depiction of primer locations along the genomic *PFP1* sequence (blue, left and upper panel) and on the phleomycin (*ble*) and hygromycin (*hph*) resistance cassettes.  $P_{gpdA}$ , promoter of the *Aspergillus gpdA* gene;  $T_{trpC}$ , terminator of the *Aspergillus trpC* gene. Primers used for the amplification of *GPD* and *HTRA* in qPCR are not shown. Primer lengths are not drawn to scale.

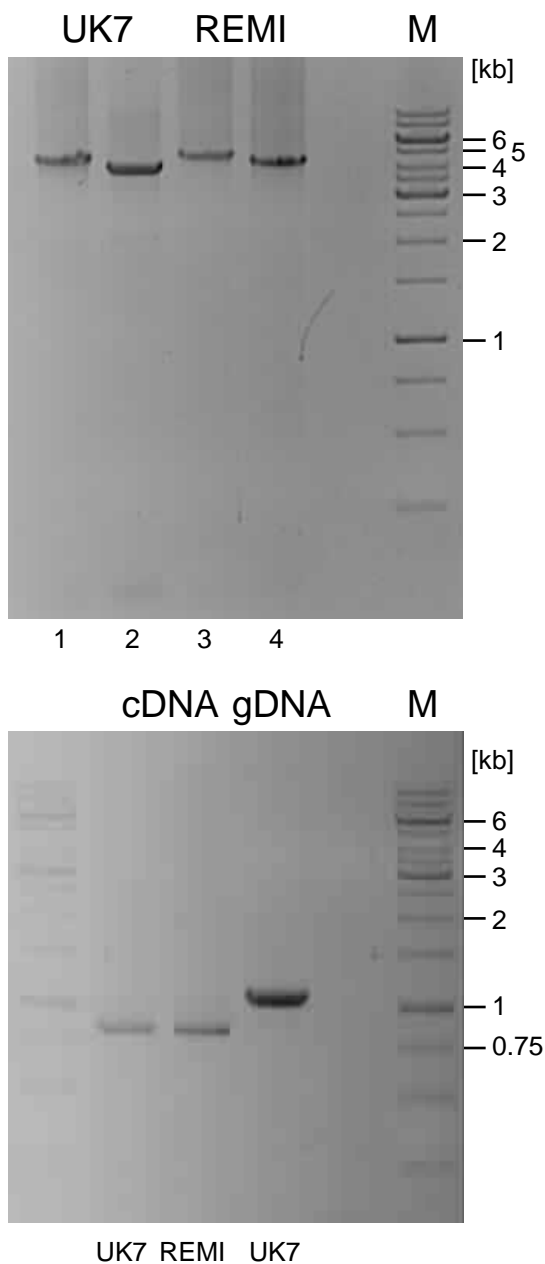

**Figure S2.** Determination of PFP1 mRNA length. **Upper panel:** RT-PCR products obtained with RNA from fungal wild-type isolate UK7 and from the REMI mutant, respectively. Fusion-primer4as was combined with four 5' primers: 1, Fusion-primer1s (4628 bp); 2, PFP1 EST s (4218 bp); 3, HPH1s (4878 bp); 4, HPH-200f (4539 bp). **Bottom panel:** The cDNA was tested for the presence of genomic DNA by amplifying the GPD sequence (cDNA: 861 bp, gDNA: 1115 bp) using the primers GPD-cDNA-test-s and GPD-cDNA-test-as.

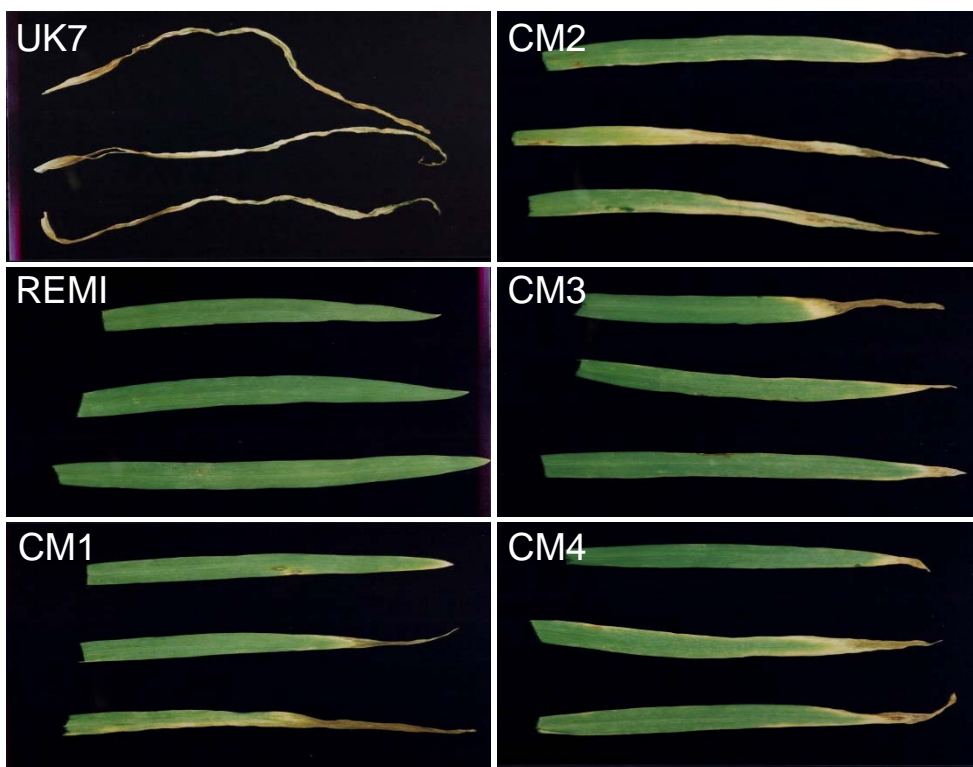

**Figure S3.** Disease phenotype caused by wild-type strain UK7, the REMI mutant and four independent REMI complementation mutants (CM1-CM4) and on susceptible barley cultivar 'Sloop' 28 dpi.



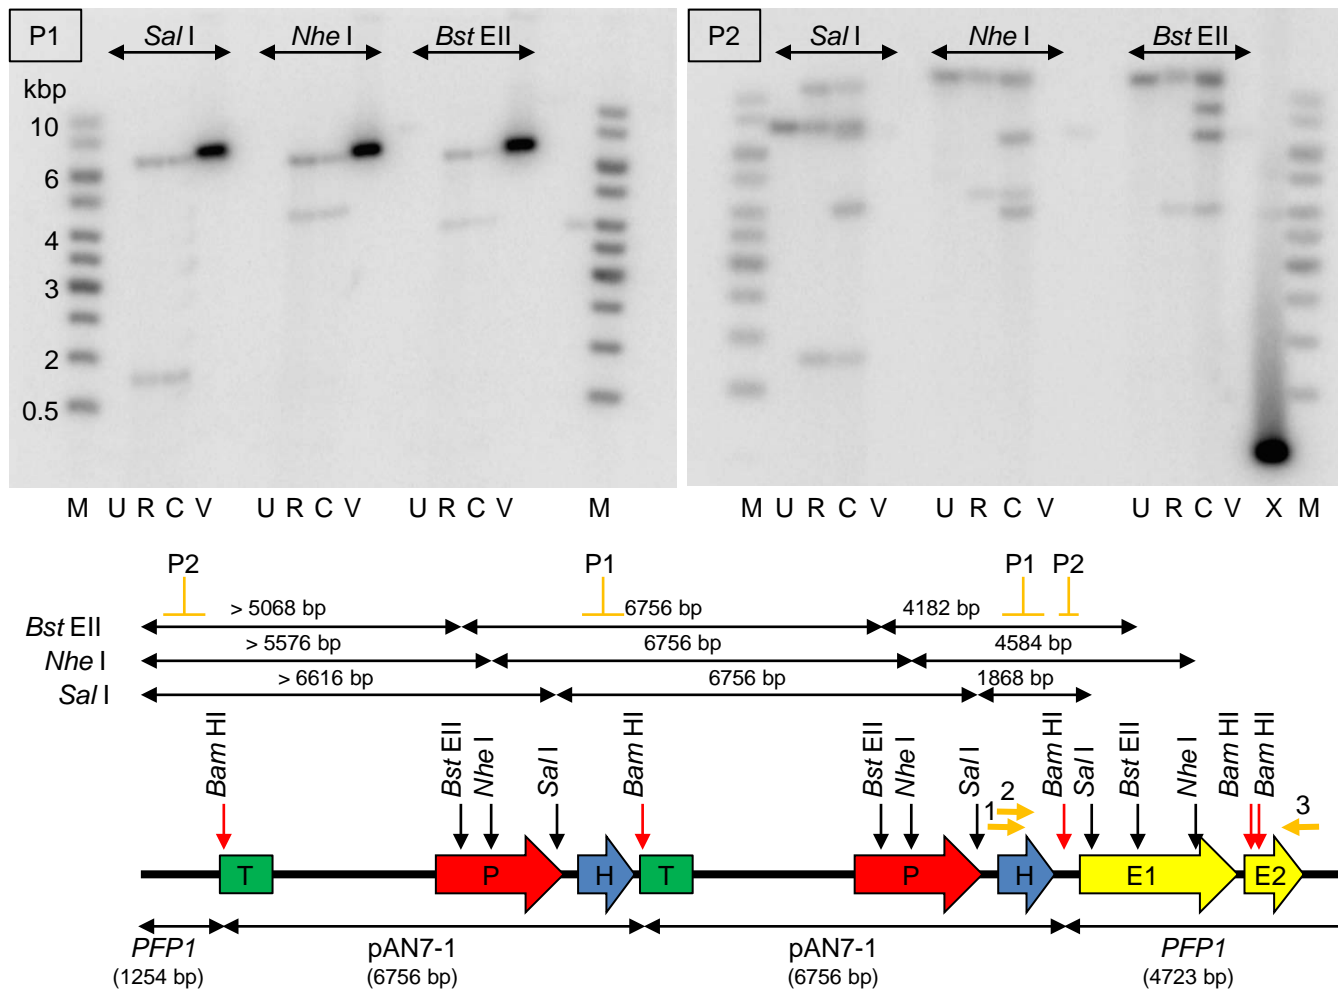

**Figure S4.** The plasmid pAN7-1 was integrated in tandem in a head-to-tail manner. **Upper panels:** DNA hybridization using DNA cleaved with the restriction enzymes *Sal*I, *Nhe*I and *Bst*EII, respectively, and probes from the *hygromycin B phosphotransferase* (*hph*) sequence (P1) or from the *PFP1* upstream region (P2). Lanes: M, size marker ladder; U, wild-type strain UK7; R, REMI mutant; C, REMI complementation mutant; V, linearized pAN7-1 as vector control; X, *Eco*RI-cleaved *PFP1* 5' UTR cloned into pCR2.1. **Bottom panel:** Schematic depiction of the plasmid integration site in the 5977-bp *PFP1* genomic sequence. E1, E2, *PFP1* exons 1 and 2; H, *hph* gene; P, promoter of the *GPDA* gene from *Aspergillus nidulans*; T, termination sequence of the *trpC* gene from *A. nidulans*. P1 and P2 indicate the probe hybridization regions. *Sal*I, *Nhe*I and *Bst*EII restriction sites are marked by black arrows, *Bam*HI sites by red arrows. Upper double-headed arrows show the position and size of the fragments identified after DNA restriction by Southern hybridization, bottom double-headed areas mark the two pAN7-1 copies and the flanking *PFP1* sequence. Orange arrows: 1, HPH1s; 2, HPH200-f; 3, Fusion-primer4as.

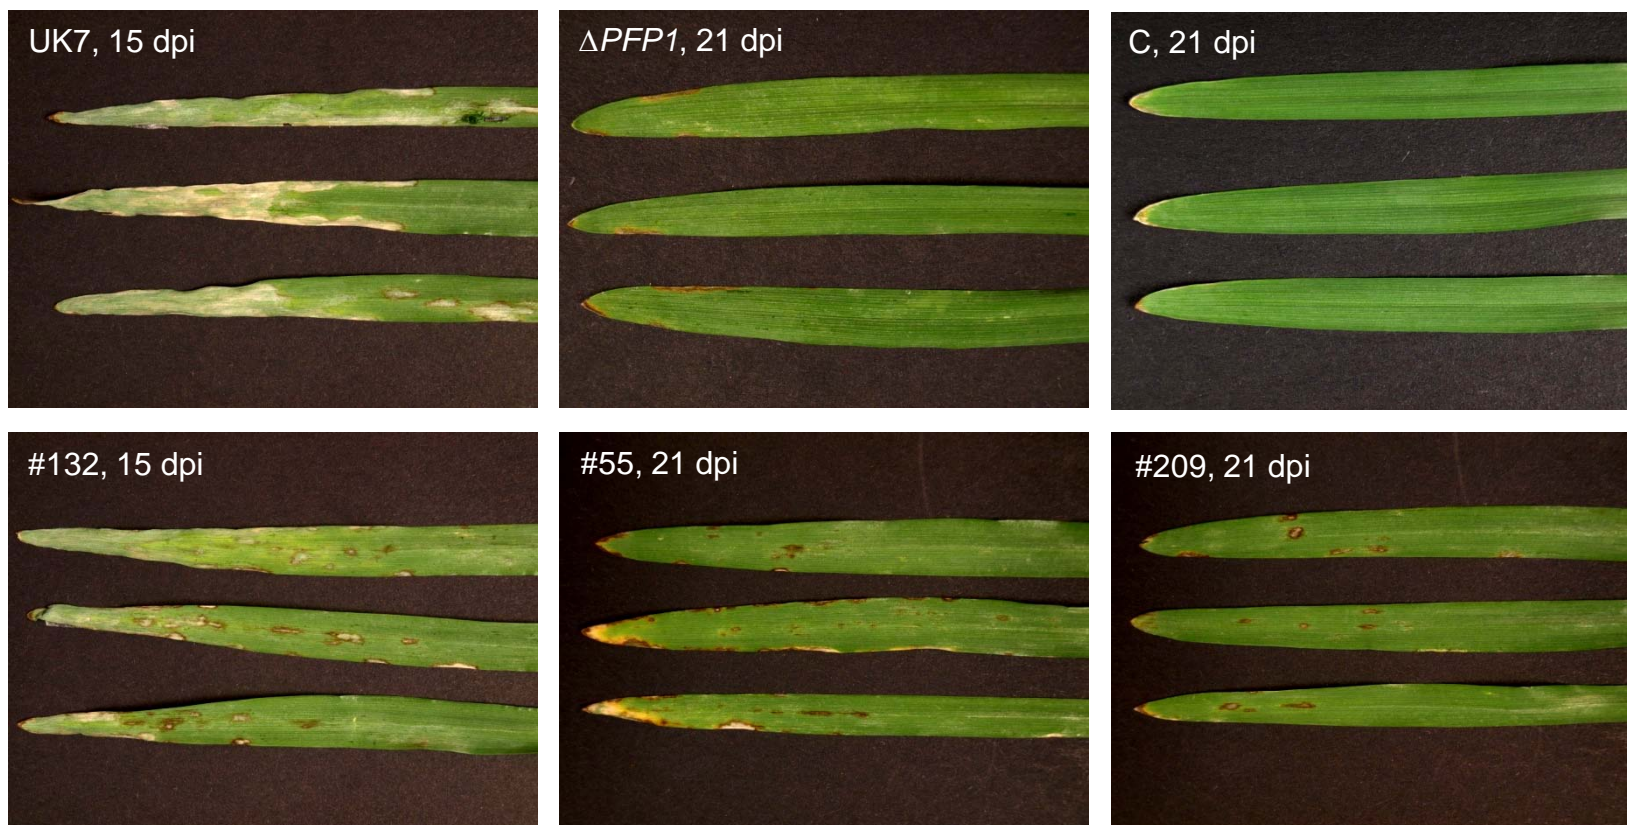

**Figure S5.** Disease phenotype on susceptible barley cultivar 'Ingrid' of fungal wild-type strain UK7, of the deletion mutant UK7*DPFP1* (*DPFP1*) and of three UK7*DPFP1* complementation mutants (#55, #132, #209). Disease symptoms were photographed at 15 dpi for wild-type strain UK7 and the most virulent complementation mutant #132, at 21 dpi for the less virulent mutants #55 and #209. C, non-inoculated control leaves.
